# Supplementary material for: Lipid Fraction Properties of Homemade Raw Cat Foods and Selected Commercial Cat Foods
Source: MDPI journal article supplement (doi:10.3390/app112210905), 2021-11-18
Supplement: s1 [file s1]

Archive with 1 entries (1 files):
- applsci-1273814-supplementary.pdf
